# Supplementary material for: Boosting the electrocatalytic activity of single atom iron catalysts through sulfur-doping engineering for liquid and flexible rechargeable Zn–air batteries
Source: Royal Society of Chemistry journal article supplement (doi:10.1039/d4ta00524d), 2024-01-01
Supplement: d4ta00524d1.pdf [file d4ta00524d1.pdf]

## Boosting Electrocatalytic Activity of Single Atom Iron Catalysts through Sulfur-Doping Engineering for Liquid and Flexible Rechargeable Zn-air Batteries

Tianfang Yang <sup>a</sup>, Bingcheng Ge <sup>a</sup>, XuPo Liu <sup>a</sup>, Zunjie Zhang <sup>b</sup>, Ye Chen <sup>a\*</sup>, Yang Liu <sup>a\*</sup>

<sup>a</sup> School of Materials Science and Engineering, Henan Normal University, Xinxiang, Henan 453007, P. R. China

<sup>b</sup> School of Chemistry and Chemical Engineering, Henan Normal University, Xinxiang, Henan 453007, P. R. China

\* Corresponding author. E-mail address: chenye@htu.edu.cn (Y. Chen), liuyang20208@htu.edu.cn (Y. Liu).

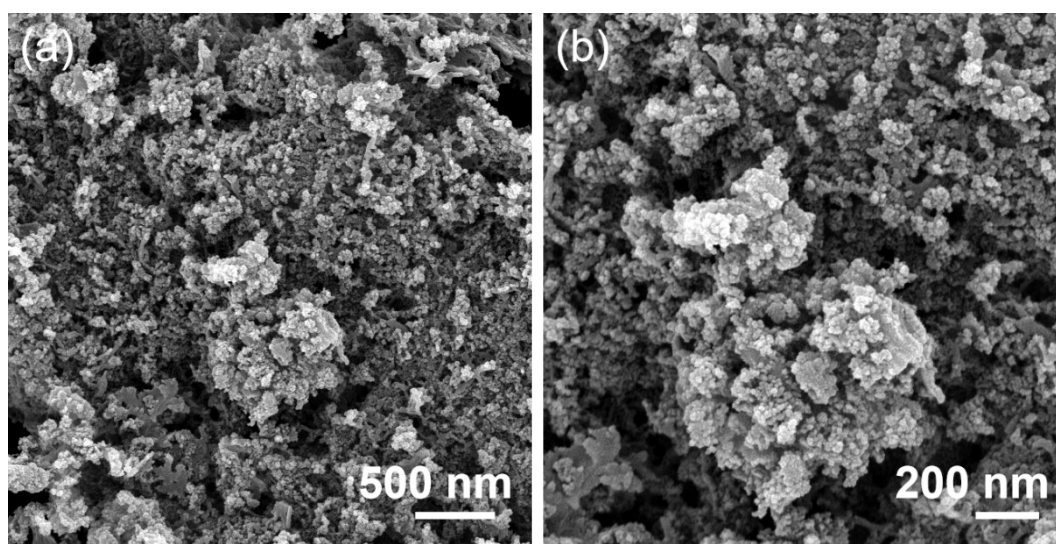

**Fig. S1.** (a) FE-SEM images of Fe SAs@N-C catalyst.

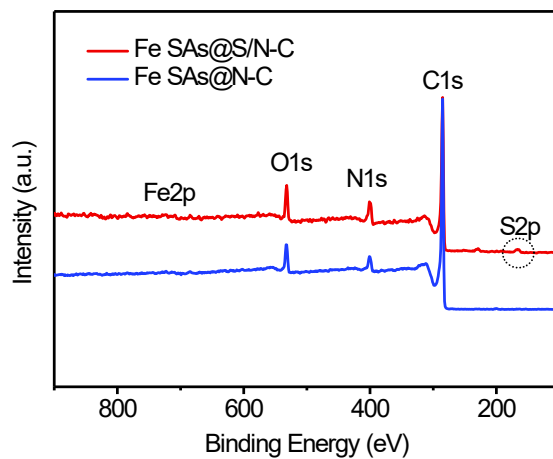

**Fig. S2.** XPS survey spectra of Fe SAs@S/N-C.

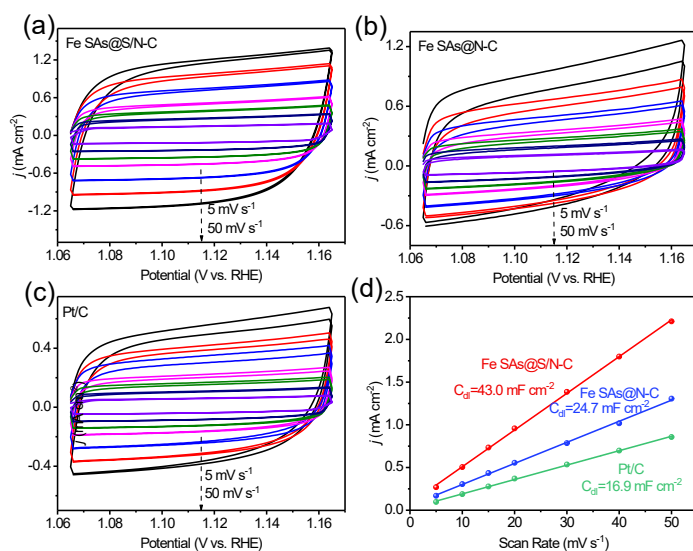

**Fig. S3.** The measurement of electrochemical double-layer capacitance ( $C_{dl}$ ). CV curves of (a) Fe SAs@S/N-C, (b) Fe SAs@N-C, (c) Pt/C in  $0.1 \text{ mol L}^{-1}$  KOH solution at the scan rates of 5, 10, 15, 20, 30, 40 and  $50 \text{ mV s}^{-1}$ . (d)  $C_{dl}$  values at different scanning rates.

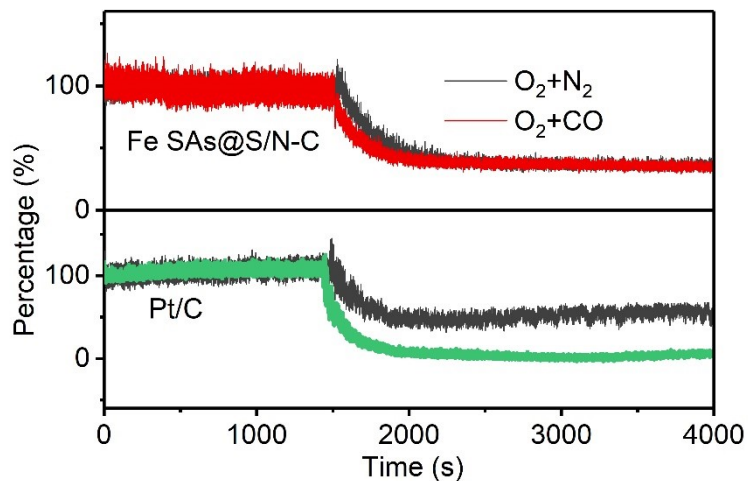

**Fig. S4.** The CO tolerance test by Chronoamperometric response of Fe SAs@S/N-C and Pt/C.

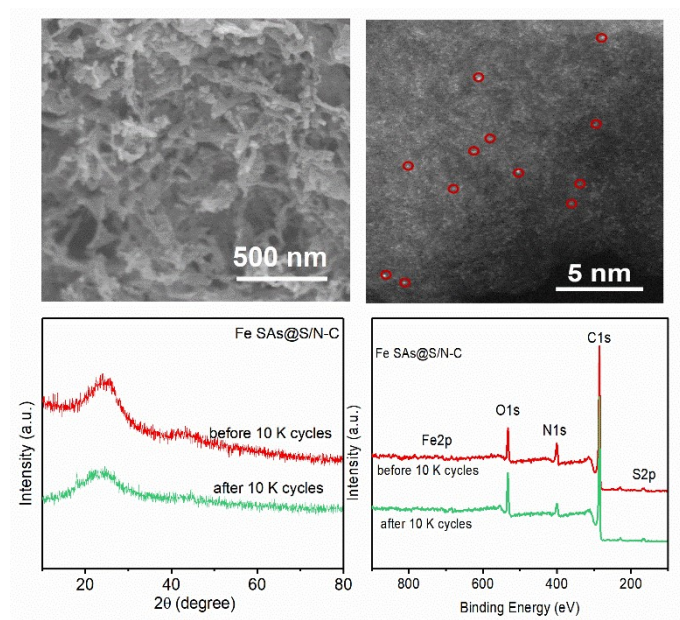

**Fig. S5.** (a) SEM images, (b) AC HAADF-STEM image, (c) XRD patterns, XPS survey spectra of Fe SAs@S/N-C after 10 K cycles

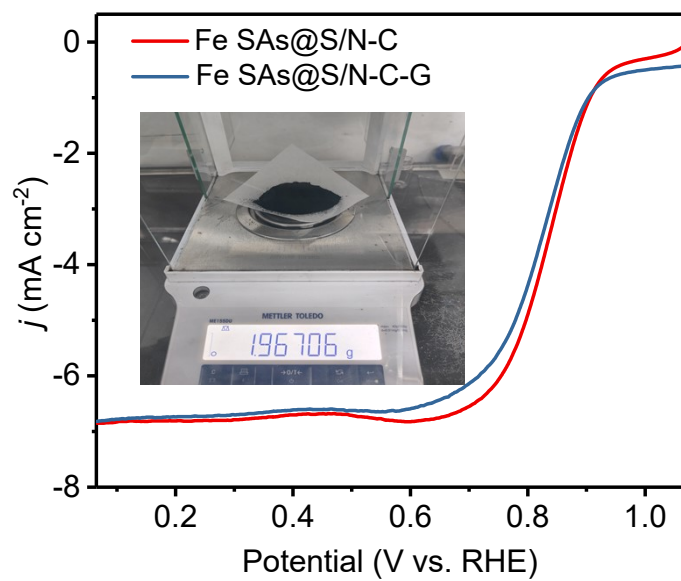

Fig. S6. LSV curves of the Fe SAs@S/N-C and Fe SAs@S/N-C-G.

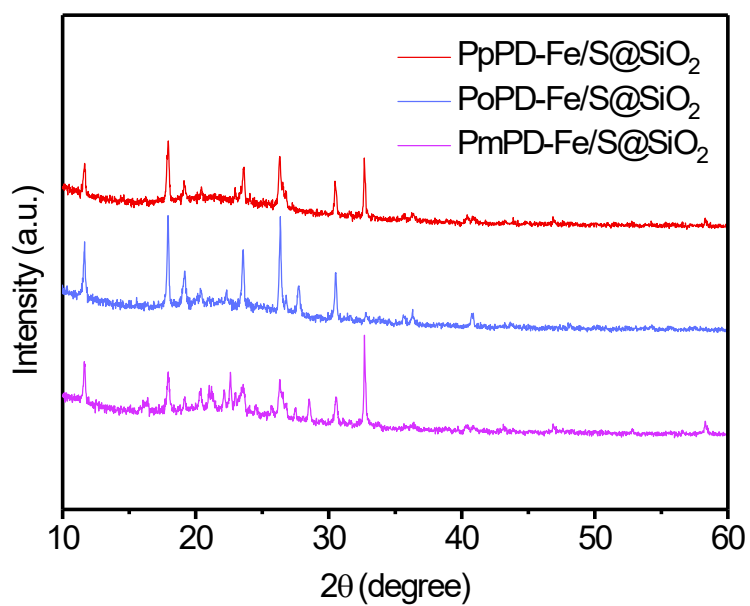

Fig. S7. XRD patterns of PpPD-Fe/S@SiO<sub>2</sub>, PoPD-Fe/S@SiO<sub>2</sub> and PmPD-Fe/S@SiO<sub>2</sub>.

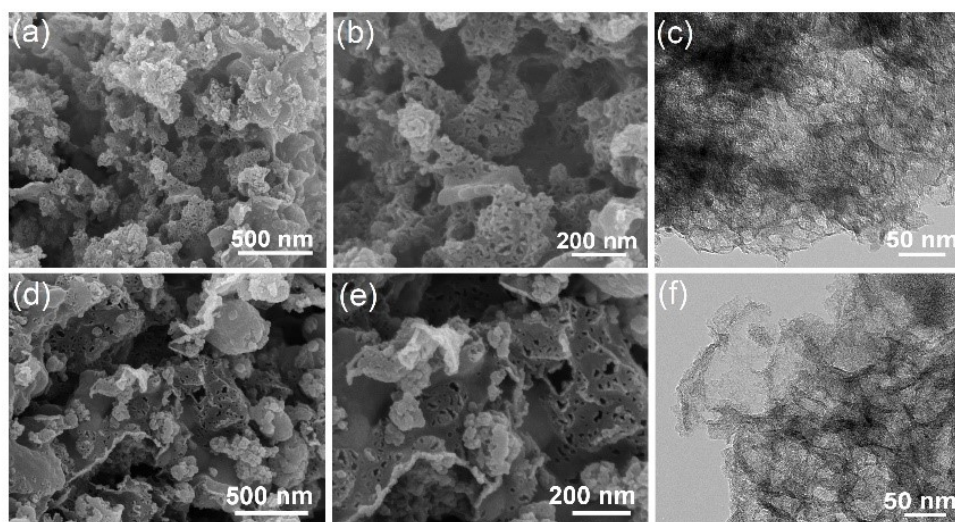

**Fig. S8.** (a-b) FE-SEM images, (c) TEM image of Fe SAs@S/N-C<sub>P<sub>0</sub>PD</sub>. (d-e) FE-SEM images, (f) TEM image of Fe SAs@S/N-C<sub>P<sub>m</sub>PD</sub>.

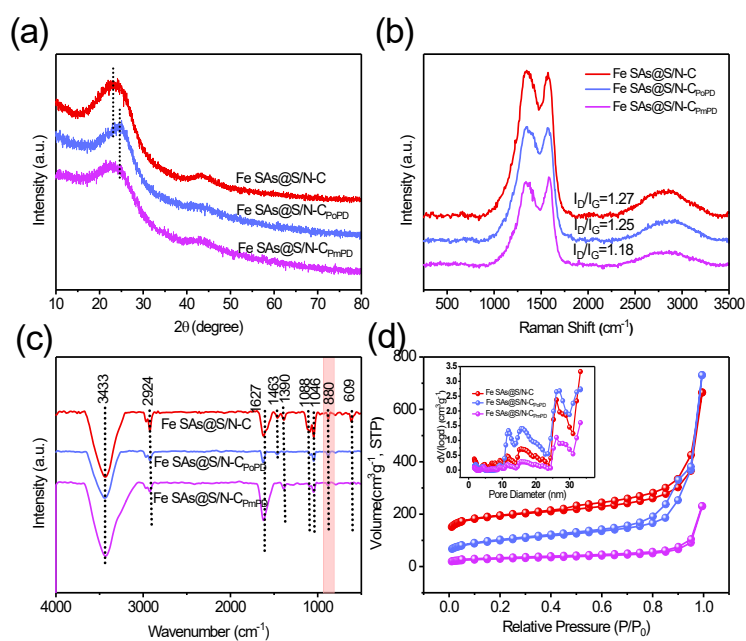

**Fig. S9.** (a) XRD patterns, (b) Raman spectra, (c) FT-IR spectra, (d) N<sub>2</sub> adsorption-desorption isotherms (inset is the pore size distribution curves) of Fe SAs@S/N-C, Fe SAs@S/N-C<sub>P<sub>0</sub>PD</sub> and Fe SAs@S/N-C<sub>P<sub>m</sub>PD</sub>.

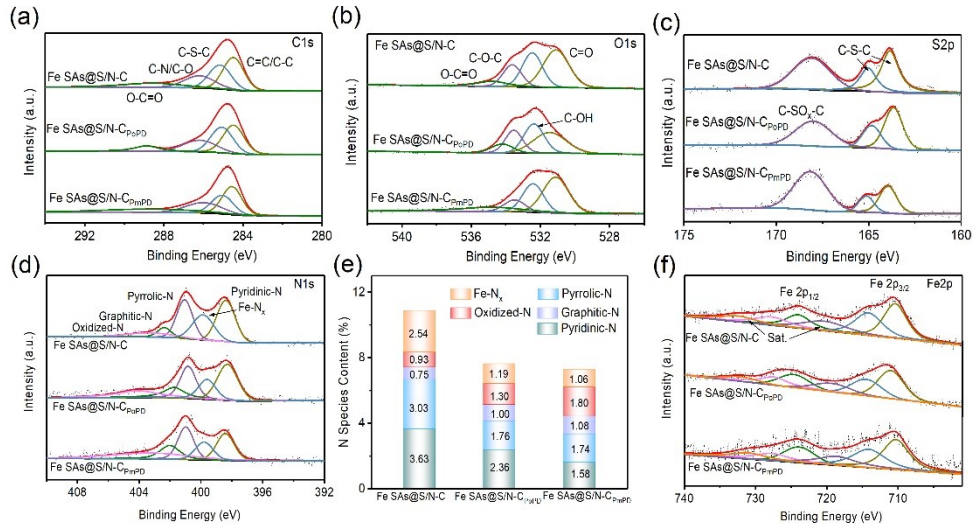

**Fig. S10.** (a) C 1s XPS spectra, (b) O 1s spectra, (c) S 2p spectra, (d) N 1s XPS spectra, (e) N contents and chemical configurations, (f) Fe 2p XPS spectra of Fe SAs@S/N-C, Fe SAs@S/N-C<sub>PoPD</sub> and Fe SAs@S/N-C<sub>PmPD</sub>.

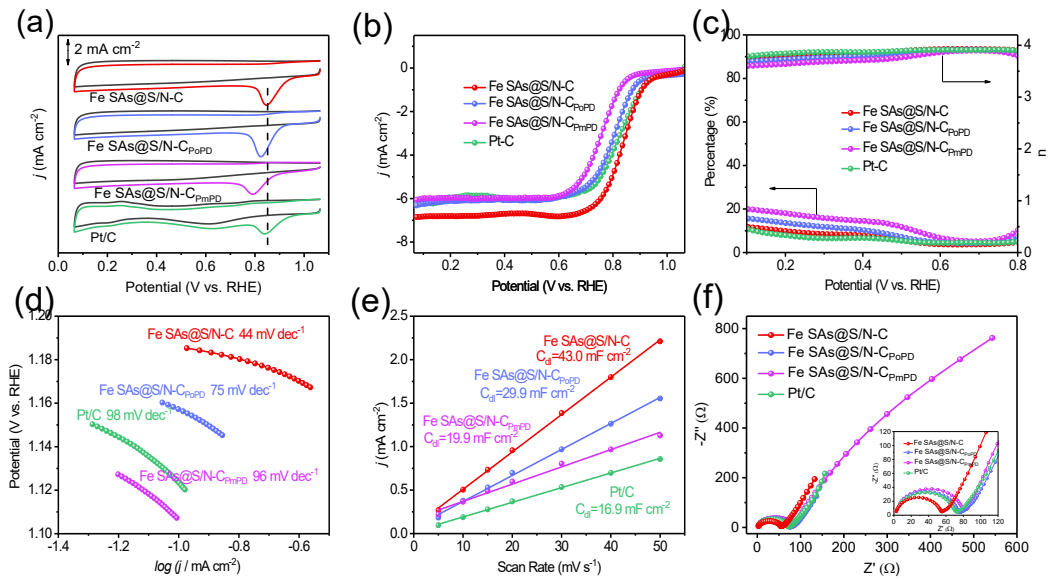

**Fig. S11.** ORR performance in O<sub>2</sub>-saturated 0.1 M KOH: (a) CV curves, (b) LSV curves. (c) H<sub>2</sub>O<sub>2</sub> yields and electron numbers, (d) Tafel plots, (e) C<sub>dl</sub> values at different scanning rates, (f) Nyquist impedance plots of Fe SAs@S/N-C, Fe SAs@S/N-C<sub>PoPD</sub> and Fe SAs@S/N-C<sub>PmPD</sub>.

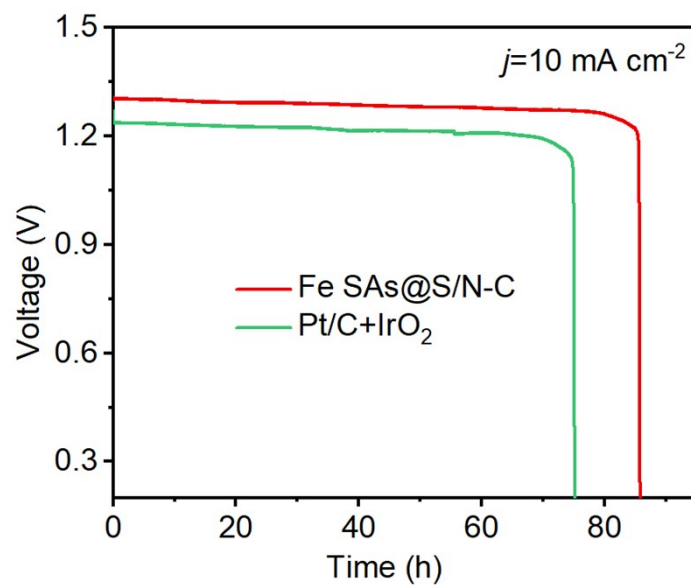

**Fig. S12.** Discharging polarization curves recorded at  $10 \text{ mA cm}^{-2}$  of Fe SAs@S/N-C and Pt/C+IrO<sub>2</sub>.

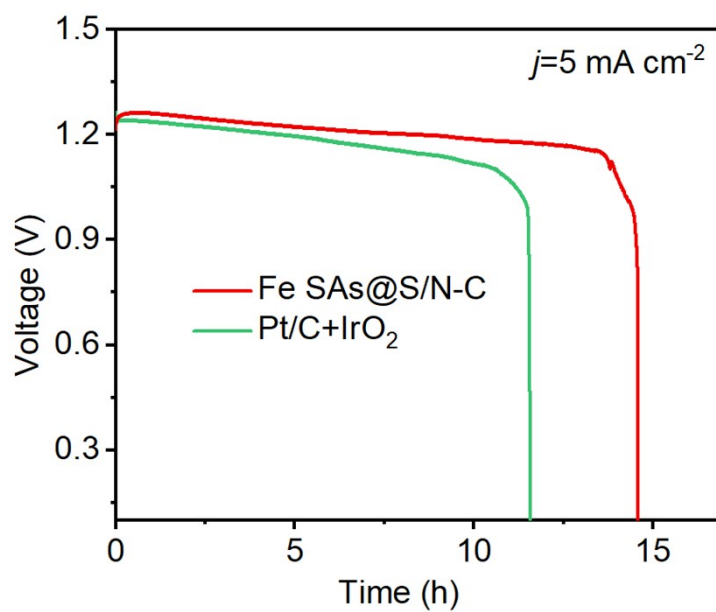

**Fig. S13.** Discharging polarization curves recorded at  $5 \text{ mA cm}^{-2}$  of Fe SAs@S/N-C and Pt/C+IrO<sub>2</sub>.

**Table S1** The intensity ratios of the D band and G band, specific surface area and elemental contents of Fe SAs@S/N-C, Fe SAs@N-C, Fe SAs@S/N-C<sub>PoPD</sub> and Fe SAs@S/N-C<sub>PmPD</sub>.

| Sample                       | I <sub>D</sub> /I <sub>G</sub> | S <sub>BET</sub><br>(m <sup>2</sup> g <sup>-1</sup> ) | C (at.%) | N (at.%) | O (at.%) | Fe (at.%) | S (at.%) | Fe (wt%) |
|------------------------------|--------------------------------|-------------------------------------------------------|----------|----------|----------|-----------|----------|----------|
| Fe SAs@S/N-C                 | 1.27                           | 775.1                                                 | 77.92    | 10.87    | 8.86     | 0.66      | 1.69     | 5.45     |
| Fe SAs@N-C                   | 1.23                           | 363.5                                                 | 87.04    | 6.25     | 6.24     | 0.46      | /        | 2.05     |
| Fe SAs@S/N-C <sub>PoPD</sub> | 1.15                           | 334.2                                                 | 78.81    | 7.61     | 11.52    | 0.61      | 1.45     | 5.11     |
| Fe SAs@S/N-C <sub>PmPD</sub> | 1.18                           | 98.6                                                  | 83.86    | 7.26     | 7.24     | 0.50      | 1.14     | 2.44     |

**Table S2** Fitting parameters of Fe K-edge FT-EXAFS.

| Catalysts    | Path | CN   | R (Å) | σ <sup>2</sup> (Å <sup>2</sup> ) | R factor |
|--------------|------|------|-------|----------------------------------|----------|
| Fe SAs@S/N-C | Fe-N | 4.34 | 1.98  | 0.0098                           | 0.0028   |

CN is the coordination number; R is the interatomic distance (the bond length between central atoms and surrounding coordination atoms); σ<sup>2</sup> is the Debye-Waller factor (a measure of thermal and static disorder in absorber-scatterer distances). R factor is used to value the goodness of the fitting.



**Table S3.** The ORR performance comparison of Fe SAs@S/N-C and other related carbon materials in the recently published works.

| Catalysts                                       | $E_{\text{onset}}$ (V) | $E_{1/2}$ (V) | References       |
|-------------------------------------------------|------------------------|---------------|------------------|
| <b>Fe SAs@S/N-C</b>                             | <b>0.96</b>            | <b>0.84</b>   | <b>This work</b> |
| Fe-BOAc-PNC                                     | 0.93                   | 0.84          | 1                |
| Co-Co <sub>3</sub> O <sub>4</sub> @NAC          | 0.93                   | 0.79          | 2                |
| S-FeNi/NiFe <sub>2</sub> O <sub>4</sub> @NC-800 | /                      | 0.84          | 3                |
| Fe SAs HS                                       | 1.0                    | 0.86          | 4                |
| Ni-N <sub>4</sub> /GHSs/Fe-N <sub>4</sub>       | 0.93                   | 0.83          | 5                |
| Fe-N/C <sub>3</sub>                             | 0.89                   | 0.78          | 6                |
| NiFe-N-C                                        | /                      | 0.87          | 7                |
| Co/CNT/MCP-850                                  | 0.94                   | 0.80          | 8                |
| PDA-Fe-900                                      | 0.92                   | 0.84          | 9                |
| Co@N-CNTF-2                                     | 0.91                   | 0.81          | 10               |
| FePc@CNF                                        | 0.966                  | 0.875         | 11               |

**Table S4** Comparison of the liquid-state ZABs performance of Fe SAs@S/N-C with recently reported electrocatalysts.

| Catalysts                                | Peak power density (mW cm <sup>-2</sup> ) | Specific capacity@10 mA cm <sup>-2</sup> (mAh g <sup>-1</sup> ) | References       |
|------------------------------------------|-------------------------------------------|-----------------------------------------------------------------|------------------|
| <b>Fe SAs@S/N-C</b>                      | <b>156</b>                                | <b>794</b>                                                      | <b>This work</b> |
| FeS/Fe <sub>3</sub> C@NS-C-900           | 90.9                                      | 750                                                             | 12               |
| Co/CeO <sub>2</sub> -NCNA@CC             | 123                                       | 784.4                                                           | 13               |
| Fe-N-C/N-OMC                             | 113                                       | 711                                                             | 14               |
| NiFe-N-C                                 | 153.04                                    | 818                                                             | 7                |
| Fe-NF-CNTs                               | 144                                       | 785                                                             | 15               |
| PDA-Fe-900                               | 163                                       | 802.1                                                           | 9                |
| Fe <sub>1</sub> Co <sub>3</sub> -NC-1100 | 372                                       | /                                                               | 16               |
| Fe/N-G-SAC                               | 120                                       | /                                                               | 17               |
| FeP/Fe <sub>2</sub> O <sub>3</sub> @NPCA | 130                                       | 717                                                             | 18               |
| HPFe-N-C                                 | 160                                       | 672                                                             | 19               |

**Table S5** Comparison of the flexible ZABs performance of Fe SAs@S/N-C with recently reported electrocatalysts.

| Catalysts                                | Peak power density<br>(mW cm <sup>-2</sup> ) | Specific capacity@5 mA<br>cm <sup>-2</sup> (mAh g <sup>-1</sup> ) | References |
|------------------------------------------|----------------------------------------------|-------------------------------------------------------------------|------------|
| Fe SAs@S/N-C                             | 122                                          | 878                                                               | This work  |
| HPFe-N-C                                 | 109                                          | /                                                                 | 20         |
| SSHPE-2                                  | 95.52                                        | /                                                                 | 21         |
| Fe1Co3-NC-1100                           | 156                                          | /                                                                 | 16         |
| KI-PVAA-GO                               | 78.6                                         | 742                                                               | 22         |
| CCNF-PDIL                                | 135                                          | 700                                                               | 23         |
| Fe SA/NCZ                                | 101                                          | /                                                                 | 24         |
| FeNS/Fe <sub>3</sub> C@CNS               | 176                                          | /                                                                 | 25         |
| PDA-Fe-900                               | 116.6                                        | 800.5                                                             | 9          |
| FeP/Fe <sub>2</sub> O <sub>3</sub> @NPCA | 40.8                                         | 676                                                               | 18         |
| Fe-BOAc-PNC                              | 93                                           | 890                                                               | 1          |

- 1 J. Zhang, Y. Chen, M. Tian, T. Yang, F. Zhang, G. Jia and X. Liu, *Chinese Chemical Letters*, 2023, **34**, 107886.
- 2 X. Zhong, W. Yi, Y. Qu, L. Zhang, H. Bai, Y. Zhu, J. Wan, S. Chen, M. Yang and L. Huang, *Applied Catalysis B: Environmental*, 2020, **260**, 118188.
- 3 H. Wang, S. Su, T. Yu, C. Meng, H. Zhou, W. Zhao, S. Yan, T. Bian and A. Yuan, *Applied Surface Science*, 2022, **596**, 153522.
- 4 Y. Wang, P. Meng, Z. Yang, M. Jiang, J. Yang, H. Li, J. Zhang, B. Sun and C. Fu, *Angewandte Chemie*, 2023, e202304229.
- 5 J. Chen, H. Li, C. Fan, Q. Meng, Y. Tang, X. Qiu, G. Fu and T. Ma, *Advanced Materials*, 2020, **32**, 2003134.
- 6 Q.-m. Wu, D.-k. Deng, Y.-l. He, Z.-c. Zhou, S.-b. Sang and Z.-h. Zhou, *Journal of Central South University*, 2020, **27**, 344-355.
- 7 H. Meng, B. Wu, D. Zhang, X. Zhu, S. Luo, Y. You, K. Chen, J. Long, J. Zhu and L. Liu, *Energy & Environmental Science*, 2024, **17**, 704-716.
- 8 X. Zhou, X. Liu, J. Zhang, C. Zhang, S. J. Yoo, J.-G. Kim, X. Chu, C. Song, P. Wang, Z. Zhao, D. Li, W. Zhang and W. Zheng, *Carbon*, 2020, **166**, 284-290.
- 9 F. Zhang, X. Liu, Y. Chen, M. Tian, T. Yang, J. Zhang and S. Gao, *Chinese Chemical Letters*, 2023,

- 108142.
- 10 H. Guo, Q. Feng, J. Zhu, J. Xu, Q. Li, S. Liu, K. Xu, C. Zhang and T. Liu, *Journal of Materials Chemistry A*, 2019, **7**, 3664-3672.
  - 11 Y. Wu, J. Liu, Q. Sun, J. Chen, X. Zhu, R. Abazari and J. Qian, *Chemical Engineering Journal*, 2024, 149243.
  - 12 Y.-W. Li, W.-J. Zhang, J. Li, H.-Y. Ma, H.-M. Du, D.-C. Li, S.-N. Wang, J.-S. Zhao, J.-M. Dou and L. Xu, *ACS Applied Materials & Interfaces*, 2020, **12**, 44710-44719.
  - 13 S. Li, H. Zhang, L. Wu, H. Zhao, L. Li, C. Sun and B. An, *Journal of Materials Chemistry A*, 2022, **10**, 9858-9868.
  - 14 J. Han, H. Bao, J.-Q. Wang, L. Zheng, S. Sun, Z. L. Wang and C. Sun, *Applied Catalysis B: Environmental*, 2021, **280**, 119411.
  - 15 Y. Liu, X. Liu, C. Zhang, Y. Chen, Z. Wang, G. Wei, J. Zhang, T. Yang, F. Zhang and S. Gao, *Journal of Alloys and Compounds*, 2023, **941**, 168922.
  - 16 Y. He, X. Yang, Y. Li, L. Liu, S. Guo, C. Shu, F. Liu, Y. Liu, Q. Tan and G. Wu, *Acs Catalysis*, 2022, **12**, 1216-1227.
  - 17 M. Xiao, Z. Xing, Z. Jin, C. Liu, J. Ge, J. Zhu, Y. Wang, X. Zhao and Z. Chen, *Advanced Materials*, 2020, **32**, 2004900.
  - 18 K. Wu, L. Zhang, Y. Yuan, L. Zhong, Z. Chen, X. Chi, H. Lu, Z. Chen, R. Zou and T. Li, *Advanced Materials*, 2020, **32**, 2002292.
  - 19 H. Xu, D. Wang, P. Yang, L. Du, X. Lu, R. Li, L. Liu, J. Zhang and M. An, *Applied Catalysis B: Environmental*, 2022, **305**, 121040.
  - 20 H. Xu, D. Wang, P. Yang, L. Du, X. Lu, R. Li, L. Liu, J. Zhang and M. An, *Appl. Catal. B-Environ.*, 2022, **305**, 121040.
  - 21 X. Fan, R. Zhang, S. Sui, X. Liu, J. Liu, C. Shi, N. Zhao, C. Zhong and W. Hu, *Angewandte Chemie International Edition*, 2023, **62**, e202302640.
  - 22 Z. Song, J. Ding, B. Liu, X. Liu, X. Han, Y. Deng, W. Hu and C. Zhong, *Adv. Mater.*, 2020, **32**, 1908127.
  - 23 M. Xu, H. Dou, Z. Zhang, Y. Zheng, B. Ren, Q. Ma, G. Wen, D. Luo, A. Yu and L. Zhang, *Angew. Chem. Int. Edit.*, 2022, e202117703.
  - 24 C. Jiao, Z. Xu, J. Shao, Y. Xia, J. Tseng, G. Ren, N. Zhang, P. Liu, C. Liu and G. Li, *Advanced*

*Functional Materials*, 2023, 2213897.

- 25 Y. Wang, T. Yang, X. Fan, Z. Bao, A. Tayal, H. Tan, M. Shi, Z. Liang, W. Zhang and H. Lin,  
*Angewandte Chemie International Edition*, 2024, **63**, e202313034.
